# Supplementary material for: Atomic-layer soft plasma etching of MoS2
Source: PubMed Central journal article supplement (PMC4728689; doi:10.1038/srep19945), 2016-01-27
Supplement: srep19945-s1.pdf [file srep19945-s1.pdf]

## Supplementary Information

### Atomic-layer soft plasma etching of MoS<sub>2</sub>

Shaoqing Xiao<sup>\*,1,‡</sup>, Peng Xiao<sup>1,‡</sup>, Xuecheng Zhang<sup>1</sup>, Dawei Yan<sup>1</sup>, Xiaofeng Gu<sup>1</sup>,  
Fang Qin<sup>2</sup>, Zhenhua Ni<sup>\*,3</sup>, Zhao Jun Han<sup>4</sup>, and Kostya (Ken) Ostrikov<sup>\*,4,5,6</sup>

<sup>1</sup> Engineering Research Center of IoT Technology Applications (Ministry of Education),

Department of Electronic Engineering, Jiangnan University, Wuxi 214122, China.

<sup>2</sup> Analysis & Testing Center, Jiangnan University, Wuxi 214122, China

<sup>3</sup> Department of Physics, Southeast University, SEU Research Center of Converging  
Technology, Nanjing 211189, China

<sup>4</sup> CSIRO Manufacturing, P.O. Box 218, Lindfield, New South Wales 2070, Australia

<sup>5</sup> School of Physics, The University of Sydney, Sydney, New South Wales 2006, Australia

<sup>6</sup> Institute for Future Environments and School of Chemistry, Physics and Mechanical  
Engineering, Queensland University of Technology, Brisbane, QLD 4000, Australia

E-mail: *larring0078@hotmail.com; zhni@seu.edu.cn; kostya.ostrikov@csiro.au*

<sup>‡</sup>These authors contributed equally to this work.

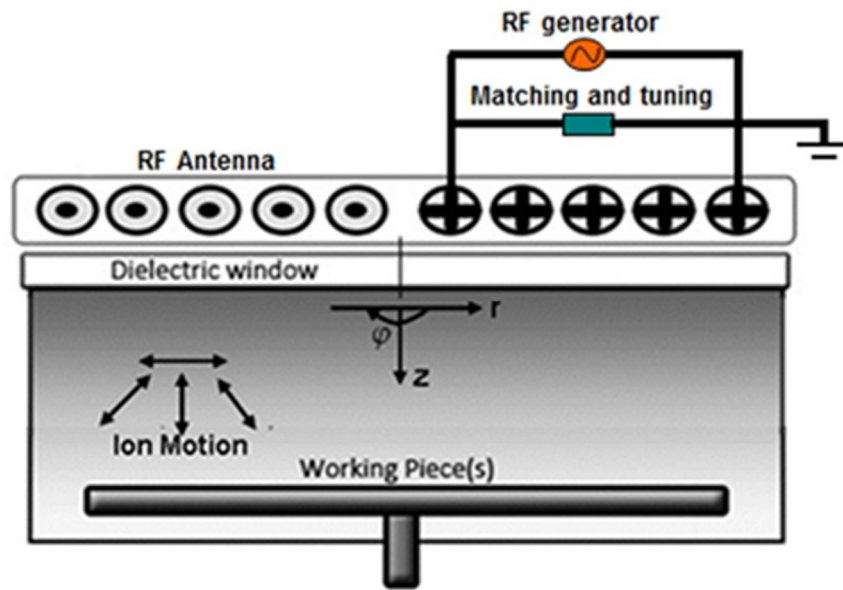

**Figure S1** | The schematics of the experimental setup of the planar E-mode ICP source.

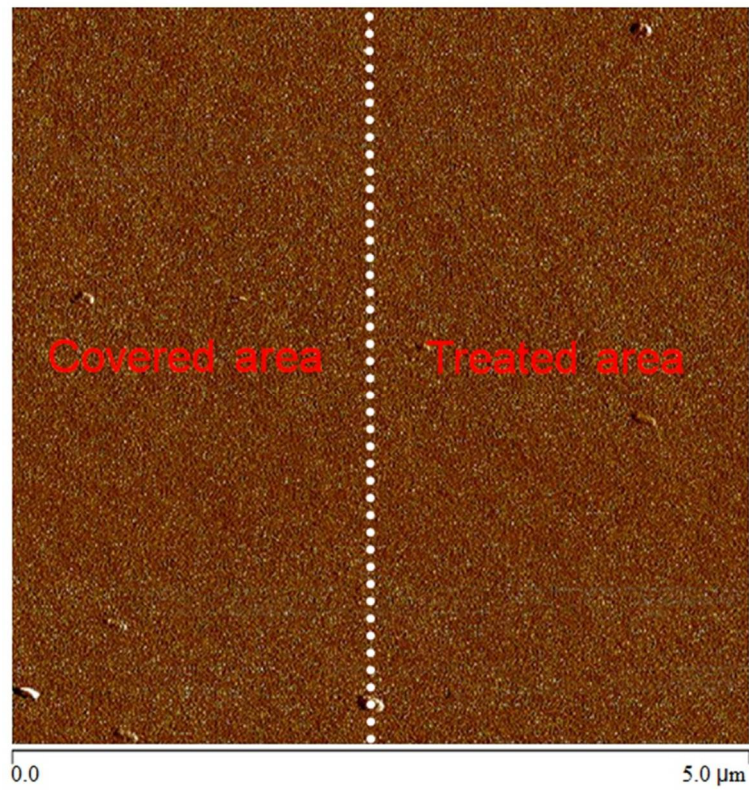

**Figure S2** | A representative AFM surface morphology of the SiO<sub>2</sub>/Si substrate consisting of the treated area under SF<sub>6</sub> + N<sub>2</sub> plasma environment for 2 hr and the covered area.

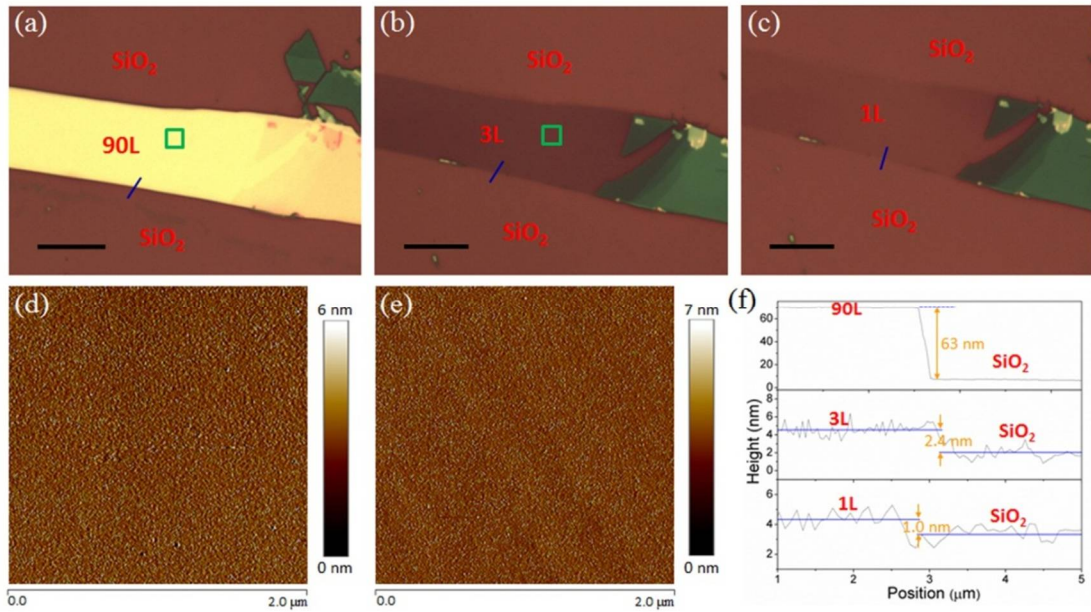

**Figure S3** | (a) A large-area thick MoS<sub>2</sub> multilayer and (b,c) its corresponding etched samples by combining the fine and fast etching modes at power densities of 0.8 and 1.2 mW/cm<sup>3</sup>, respectively. a) Optical image of pristine MoS<sub>2</sub> flakes; (b) after 20 min etching at 1.2 mW/cm<sup>3</sup>; (c) after 4 min etching at 0.8 mW/cm<sup>3</sup>. (d) and (e) are the corresponding AFM images of the squared regions in (a) and (b), respectively. The rms roughness in (d) and (e) is 0.7 nm and 0.8 nm, respectively. (f) The AFM depth profiles of MoS<sub>2</sub> as denoted by blue lines in (a-c). Scale bars in (a-c) are 10 μm.

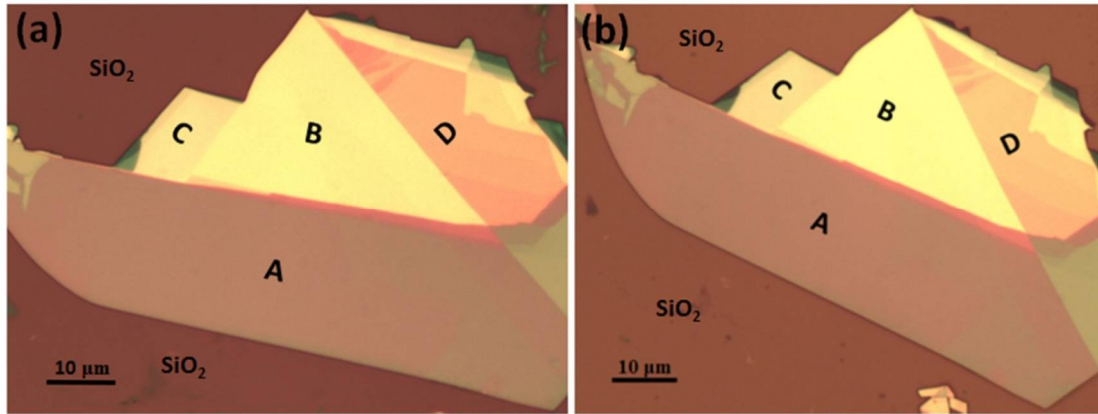

**Figure S4** | Optical images of the pristine sample used for etching in Figure 2: before (a) and after (b)  $\text{SF}_6+\text{N}_2+\text{H}_2$  plasma etching at an input power density of  $4.0 \text{ mW/cm}^3$ . The A area is made of  $\sim 158$   $\text{MoS}_2$  layers, the B area  $\sim 87-91$  layers, the C area  $\sim 53$  layers, and the D area  $\sim 106-109$  layers. The etching thickness of  $\text{SiO}_2$  after this plasma process is estimated to be about 20 nm deduced from the AFM results.

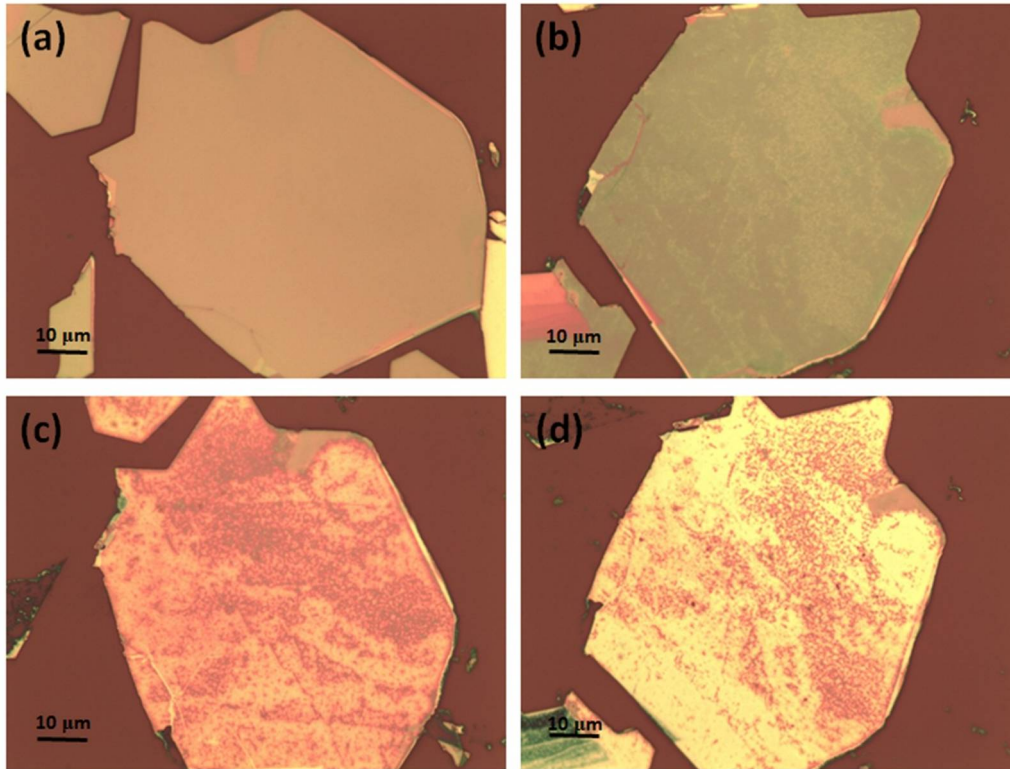

**Figure S5** | (a) Optical images of a large-area thick MoS<sub>2</sub> flake. (b) The same sample after 10 min etching at a power density of 2 mW/cm<sup>3</sup>; (c) after another 10 min etching at the same power; and (d) after further 10 min etching at the same power. Non-uniform and rough surface was observed on the etched MoS<sub>2</sub> flake.

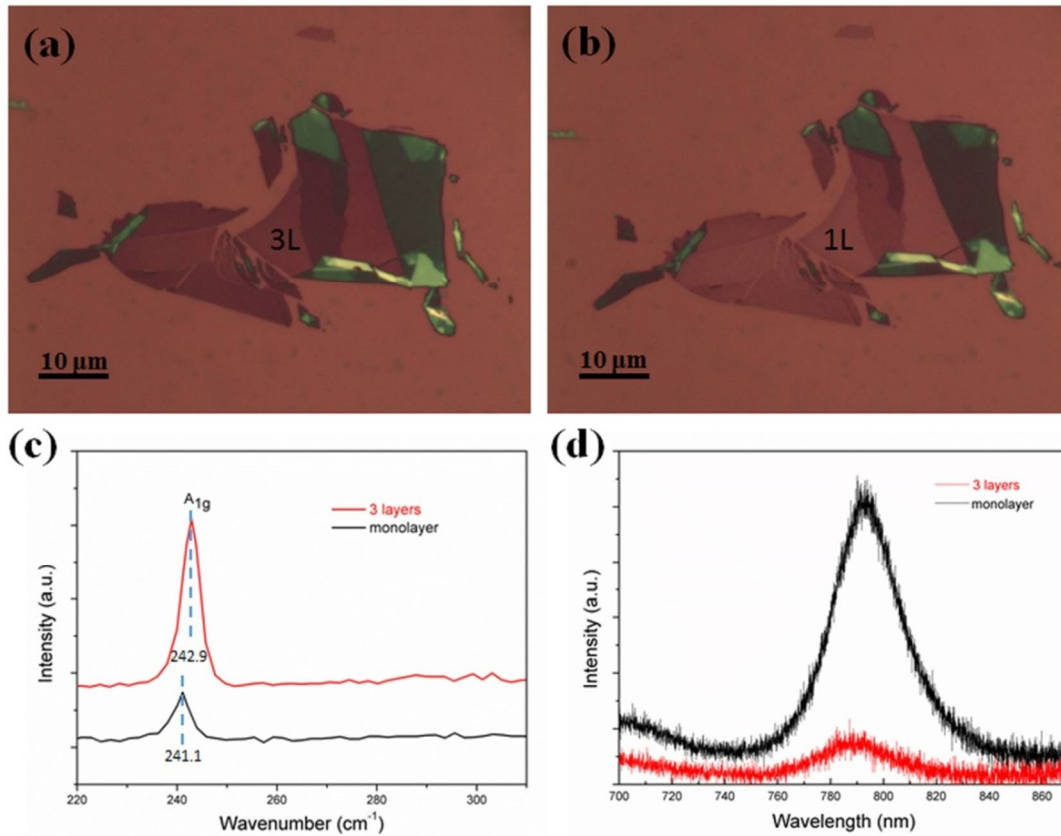

**Figure S6** | Two typical optical images of plasma-etched MoSe<sub>2</sub> flakes. (a) Pristine MoSe<sub>2</sub> flake showing 3 layers; (b) monolayer (1L) after 1 min *fine* plasma etching; (c) corresponding Raman spectra and (d) PL spectra before and after this soft plasma thinning. About 2 layers were removed after the etching process. One can see that as the number of MoSe<sub>2</sub> layers was decreased, the A<sub>1g</sub> Raman mode shifted from 242.9 to 241.1 cm<sup>-1</sup>, which was in good agreement with previous report [see *Nano Lett.* 12, 5576 (2012)]. The PL spectra also showed a large enhancement when the 3 layers of MoSe<sub>2</sub> were thinned down to monolayer. Similar to MoS<sub>2</sub> PL results, this enhancement in PL for single-layer MoSe<sub>2</sub> can be attributed to an indirect-to-direct bandgap transition.

## Supplementary Table

**Table S1** | Summary of competitive advantages of our soft plasma etching method of thinning MoS<sub>2</sub> compared to other methods such as thermal annealing, laser thinning and Ar plasma thinning.

| Features                                                        | Thermal thinning | Laser thinning | Ar Plasma thinning | Soft etching                                                                   |
|-----------------------------------------------------------------|------------------|----------------|--------------------|--------------------------------------------------------------------------------|
| Number of layers etched                                         | 1-7              | Unkown         | 1-3                | <b>Any*</b>                                                                    |
| Layers removal rate                                             | 1 layer/hr       | Unkown         | 1 layer/115 s      | <b>1 layer/180 s (fine etching mode)<br/>290 layers/hr (fast etching mode)</b> |
| Domain area reduction                                           | Yes              | Yes            | No                 | <b>No</b>                                                                      |
| Etching residues left on surface                                | No               | Yes            | Yes                | <b>No</b>                                                                      |
| Damage to underlying layers                                     | Yes              | Yes            | No                 | <b>No</b>                                                                      |
| Selective etching between MoS <sub>2</sub> and SiO <sub>2</sub> | Yes              | Yes            | Yes                | <b>Yes</b>                                                                     |
| Vacuum needed                                                   | Low              | Low            | Medium             | <b>Medium</b>                                                                  |
| Controllability on etching rate                                 | Low              | Unable         | Medium             | <b>High</b>                                                                    |
| Scalability                                                     | Low              | Low            | High               | <b>High</b>                                                                    |

\*In this work the results of up to 90 layers are presented.
